# Supplementary material for: Identification and analysis of immunoreactive proteins of Shigella flexneri in human sera and stool specimens
Source: PeerJ. 2024 May 28;12:e17498. doi: 10.7717/peerj.17498 (PMC11141557; doi:10.7717/peerj.17498)
Supplement: Supplemental Information 2 [file peerj-12-17498-s002.xlsx]

## Sheet: Sheet1
Tested samples	Anti-IgA	Anti-IgM	Anti-IgG	Immunoreactivity of the 35 kDa protein with anti-human IgA
Serum shigelosis SF480	+	+	+	NA
Stool Shigella flexneri SF10	+	-	-	+
Stool enteropatogenik E. coli 1	-	-	-	–
Stool Salmonella typhi 1	-	-	-	–
Stool Salmonella typhi 2	-	-	-	–
Stool Vibrio cholerae	-	-	-	–
Stool Campylobacter jejuni	-	-	-	–
Stool enteropatogenik E. coli 2	-	-	-	–
Stool Entamoeba histolytica	-	-	-	–
Stool Giardia lamblia	-	-	-	–
Serum S. flexneri	NA	NA	NA	+
Stool S. flexneri SF3	NA	NA	NA	+
Stool S. flexneri SF6	NA	NA	NA	+

## Sheet: Sheet2
Antigenic protein (kDa)	IgA	IgM	IgG
21	+	–	+
22	–	–	+
35	+	+	+
38	+	–	–
48	+	–	–
50	+	–	–
52	+	–	–
58	+	+	–
60	+	–	–
